# Supplementary material
Source: PubMed Central journal article supplement (PMC4825113)
Supplement: supp_pp.15.01696_PP2015-01696R1_Supplemental_Material.pdf [file supp_pp.15.01696_PP2015-01696R1_Supplemental_Material.pdf]

## SUPPLEMENTAL INFORMATION

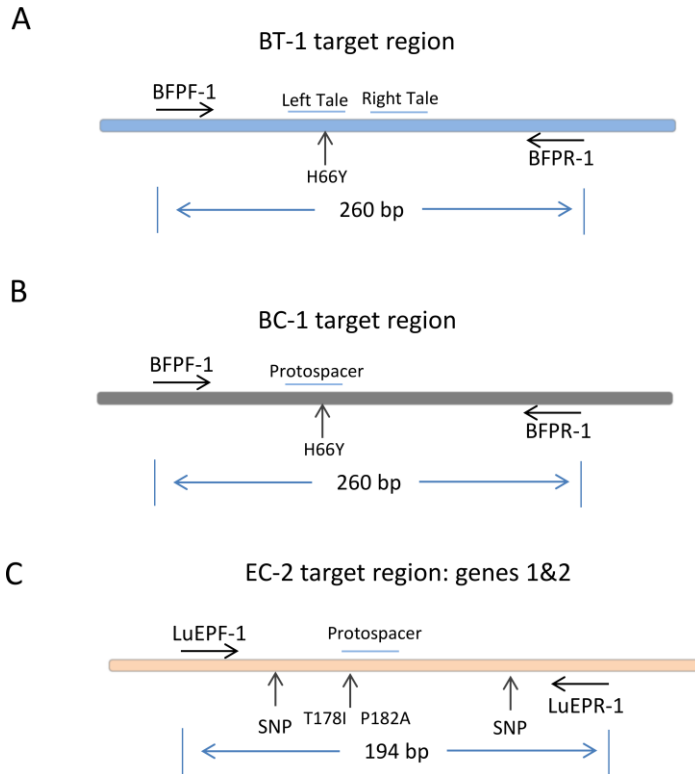

**Supplemental Figure S1.** Diagram showing the methodology for amplicon deep sequencing analysis. A, Primers BFPP-1 and BFPR-1 amplify a region 260 bp in length that flanks the BT-1 TALEN binding region. B, Primers BFPP-1 and BFPR-1 amplify a region 260 bp in length that flanks the BC-1 target region. C, Primers LuEPF-1 and LuEPR-1 amplify a region 194 bp in length from a conserved region in genes 1 and 2. SNPs within the amplicon provide gene 1 and 2 specificity.

**Supplemental Table S1. Sequence of ssODNs used in this study**

| ID         | Sequence (5' to 3')                                                                                                                                                                                                                                                                                                     | Chemistry                |
|------------|-------------------------------------------------------------------------------------------------------------------------------------------------------------------------------------------------------------------------------------------------------------------------------------------------------------------------|--------------------------|
| BFP/41     | G*C*T*GAAGCACTGCACGCCGTAGGTGAAGGTGGTCACGA*G*G*G                                                                                                                                                                                                                                                                         | (*) = 3PS                |
| BFP/41/NT  | G*C*T*GAAGCACTGCACGCCGTGGGTGAAGGTGGTCACGA*G*G*G                                                                                                                                                                                                                                                                         | (*) = 3PS                |
| BFP/101    | G*T*C*GTGCTGCTTCATGTGGTCGGGGTAGCGGCTGAAGCACTGCACGCCGTAGGTGA<br>AGGTGGTCACGAGGGTGGGCCAGGGCACGGGCAGCTTGCCGG*T*G*G                                                                                                                                                                                                         | (*) = 3PS                |
| BFP/201    | A*A*G*ATGGTGCCTCCTGGACGTAGCCTTCGGGCATGGCGGACTTGAAGAAGTCGTG<br>CTGCTTCATGTGGTCGGGGTAGCGGCTGAAGCACTGCACGCCGTAGGTGAAGGTGGTCA<br>CGAGGGTGGGCCAGGGCACGGGCAGCTTGCCGGTGGTGCAGATGAACTTCAGGGTCAG<br>CTTGCCGTAGGTGGCATCGCCCTCG*C*C*C                                                                                              | (*) = 3PS                |
| EPSPS/144* | VCGGTCGGTAAACTGGCGAAGAACGATATTGAACTTTTCCTTGAAATGCTGGAATAGC<br>TATGCGTGCGCTGACAGCTGCTGTAACAGCCGCTGGAGGCAACTCAAGGTCCTTCCTC<br>AACTCCTCCAGCCTTTCAGCTTCTTH<br>and<br>VCGGTCGGTAAACTGGCGAAGAACGATATTGAACTTTTCCTTGAAATGCTGGAATAGC<br>TATGCGTGCGCTGACAGCTGCTGTAACAGCCGCTGGAGGCAACTCAAGGTCCTTCCTC<br>AACTCCTCCAGCCTTTCAGCTTCTTH | V=Cy3;<br>H=3'DMT dC CPG |

\*EPSPS/144 consists of an equimolar mixture of two ssODNs, each containing sequence specific SNPs for *EPSPS* gene 1 and 2. 3PS- 3 consecutive phosphorothioate linkages. Cy3- cyanine dye 3.

**Supplemental Table S2. TALE binding domain sequence**

| TALEN ID | Sequence (5' to 3')                                             |
|----------|-----------------------------------------------------------------|
| BT-1     | Left arm: TGGTCGGGGTAGCGGCTGA<br>Right arm: TCGTGACCACCTTCACCCA |

**Supplemental Table S3. Primers used in this study**

| ID      | Sequence 5'-3'               | Species            |
|---------|------------------------------|--------------------|
| BFPF-1  | TAAACGGCCACAAGTTCAGC         | <i>Arabidopsis</i> |
| BFPR-1  | GGACGACGGCAACTACAAGACC       | <i>Arabidopsis</i> |
| LuEPF-1 | GCATAGCAGTGAGCAGAAGC         | Flax               |
| LuEPR-1 | AGAAGCTGAAAGGCTGGAAG         | Flax               |
| Off-1FA | GGAAGCAAACAGGTGACAGC         | <i>Arabidopsis</i> |
| Off-1RA | CGTATTTAGCCTCATCCAATGC       | <i>Arabidopsis</i> |
| Off-2FA | AAGGCTCCTCCAACCTCACC         | <i>Arabidopsis</i> |
| Off-2RA | TTCTCTGACTCTGATGGAGACC       | <i>Arabidopsis</i> |
| Off-3FA | CCCTTGGTGCAACATAAACC         | <i>Arabidopsis</i> |
| Off-3RA | GCGATGAATTTGAATTTTGACC       | <i>Arabidopsis</i> |
| Off-4FA | TTCGGGTTTAACGGGACAG          | <i>Arabidopsis</i> |
| Off-4RA | CGATTCCGGTAATTCACATTG        | <i>Arabidopsis</i> |
| Off-5FA | AAACCCTAGTGGCAGTTTCG         | <i>Arabidopsis</i> |
| Off-5RA | CGGTGGAAGCCCTGTTTAT          | <i>Arabidopsis</i> |
| Off-1FF | CAAGGCTAATTAGACTTAGATGATGTGG | Flax               |
| Off-1RF | GGTGCACCGCC                  | Flax               |
| Off-2FF | CAAGGCTAATTAGACTTAGATGATGTGG | Flax               |
| Off-2RF | GGTGCACCGCC                  | Flax               |
| Off-3FF | GCCATCATCGCCCTTTAAGC         | Flax               |
| Off-3RF | TGGTGTTTTGCTCTGTGAACG        | Flax               |
| Off-4FF | GCCATCATCGCCCTTTAAGC         | Flax               |
| Off-4RF | TGGTGTTTTGCTCTGTGAACG        | Flax               |
| Off-5FF | GCCATCATCGCCCTTTAAGC         | Flax               |
| Off-5RF | TGGTGTTTTGCTCTGTGAACG        | Flax               |
| Off-6FF | GCCATCATCGCCCTTTAAGC         | Flax               |
| Off-6RF | TGGTGTTTTGCTCTGTGAACG        | Flax               |
| Off-7FF | GAAAGAAGGCACTCTCAGAACATAC    | Flax               |
| Off-7RF | TGAATTTTGCTATCCTCTCCCAATTTG  | Flax               |
| Off-8FF | CGTACGTTGTCAAGAAGTGACC       | Flax               |
| Off-8RF | ACCAAGACGGTAGTGGATGTC        | Flax               |

**Supplemental Table S4. Protospacer sequence of sgRNAs used in this study**

| CRISPR/Cas9 ID | Sequence 5'-3'       |
|----------------|----------------------|
| BC-1           | GTCGTGACCACCTTCACCCA |
| EC-2           | GCTGTTACAGCAGCTGTCAG |

G in red font altered in the sgRNA sequence to accommodate Pol III promoter

**Supplemental Table S5. BC-1 off-targets**

| Off-target ID | <i>Arabidopsis</i> Chrom # | Position | Off target sequence      | # of mismatches | Gene                    |
|---------------|----------------------------|----------|--------------------------|-----------------|-------------------------|
| Off-1         | chr1                       | 13067189 | gTtGTtgCCACCTTCAaCCAAGG  | 5               | intergenic              |
| Off-2         | chr2                       | 19145890 | CaCGTccCCACCaTctCCCAAGG  | 5               | uncharacterized protein |
| Off-3         | chr5                       | 17191806 | tTCaTcACCAGcTTCCACCaATGG | 5               | uncharacterized protein |
| Off-4         | chr4                       | 4803635  | tTCGTGctCACCTTCACggATGG  | 5               | Cellulose-synthase like |
| Off-5         | chr4                       | 14554739 | CTCGaacCCACCTTCAGCaAAGG  | 5               | polyamine oxidase 5     |
| On            | NA                         | NA       | CTCGTGACCACCTTCACCCACGG  | NA              | BFP transgene           |

**Supplemental Table S6. Off-target analysis of flax plant A23**

| Off-Target ID | Scaffold or Locus ID <sup>a</sup> | Position <sup>b</sup> | Off Target Sequence <sup>c</sup> | # of Mismatches | Mutations detected <sup>d</sup> |
|---------------|-----------------------------------|-----------------------|----------------------------------|-----------------|---------------------------------|
| Off-1         | C7813595                          | 197-219               | ccgGTTACAGCAGCaGTCgGCGG          | 5               | -                               |
| Off-2         | Lus10030959.g                     | 243476-243460         | ccgGTTACAGCAGCaGTCgGCGG          | 5               | -                               |
| Off-3         | Scaffold 155                      | 681644-681624         | tcaaaagCtGCAGCTaTCAGTGG          | 9               | -                               |
| Off-4         | Lus10036882.g                     | 1067934-1067911       | tcaaaatCtGCAGCTGTcAGTGG          | 8               | -                               |
| Off-5         | Scaffold 107                      | 1077588-1077568       | tcaaaatCtGCgGCTGTcAGTGG          | 9               | -                               |
| Off-6         | Scaffold 743                      | 195079-195059         | tcaaaatCtGCgGCTGTcAGTGG          | 9               | -                               |
| Off-7         | Scaffold 208                      | 238604-238626         | aaggacACAGCAGCTGTcGTGG           | 7               | -                               |
| Off-8         | Scaffold 2252                     | 38795-38773           | accaaacgAGCAGCTGTcAGAGG          | 8               | -                               |
| On            | Lus10000788.g                     | 19227-19249           | GCTGTTACAGCAGCTGTcAGCGG          | 0               | +                               |

<sup>a</sup>Scaffold or locus ID from Phytozyme 10.2<sup>b</sup>Protospacer position within scaffold<sup>c</sup>Red lowercase bases are mismatches to the EC-2 protospacer<sup>d</sup>Mutations determined by sequencing; On-target mutations are T178I and P182A**Supplementary Sequences**

Flax EPSPS gene 1

Locus name Lus10030282

ATGGCGCTAGTTACCAAAATCTGCGGCGGAGCTAAATGCTGTTGCTCTCCCCGCTACATTTGGAACCTCGAA  
 GAACAAAATCCATATCCTCGTTCGGTCTCGTTTATAGATCTTCAACATCTCCTCCGAGTTTGAAGCAACGCCG  
 ACGATCGGGCAATGTAGCCGCCGCCGCCGCTCCTCTTCGTGTTTCGGCATCGCTCACCACGGCAGCT  
 GAGAAGGCTTCCACGGTGCCGGAGGAGTTCGTGCTGCAGCCTATTAAAGACATATCGGGGATTGTGACTC  
 TGCTGTTTCTAAATCTCTCTCGAATCGGATTCTCCTTCTCGCCGCACTCTCTGAGGGTACAACCTGTGGT  
 GGACAACTTGTGTAACAGTGATGATGTTCACTACATGCTTGGAGCATTGAAAACACTCGGACTAAATGTG  
 GAGCATAGCAGTGAGCAGAAGCGCGCCATTGTTGAAGGTTGTGGTGGTGTGTTTCCGGTCCGTAAACTGG

CGAAGAACGATATTTTTCTCATGCTTTCGTCTACATACTCGATGGGGTACCACGAATGAGAGAGAGACC  
AATTGGAGATTTGGTTGTTGGTCTGAAGCAGCTTGGTGCTGACGTCACCTTGTCTTCGACTAGCTGCCCT  
CCCGTCCATGTAAATGGACAGGGAGGCTTGCCAGGTGGAAAGGTTAAGCTTTCCGGATCAATTAGTAGTC  
AATACTTGACTGCTTTGCTGATGGCTGCTCCTTTGGCCCTCGGAGATGTGGAAATCGAGATTGTTGATAA  
ACTGATTTTCAGTTCCCTTATGTGGACATGACATTGAAGTTAATGGAAAGGTTTCGGAGTCGCTGTGCAACAC  
AGTGGTAGTTGGGATCGTTTTCTTTGTCAAAGGAGGACAAAAGTACAAATCCCCGGGAATGCTTATGTGG  
AAGCGATGCTTCGAGTGCTAGTTACTTTCCTGGCCGGTGCAGCCATCACCGGTGGGACTATCACTGTTGA  
AGGTTGTGGGACGAGCAGTTTGCAGGGGGATGTAAAATTCGCTGAAGTTCTCGAGAAAATGGGGCGAAG  
GTTATTTGGACAGAGAACAGTGTTACCGTTACAGGGCCTCCCAGAGATGCATCTGGCAGAAAACATTTGC  
GAGCTGTCGATGTTAACATGAACAAAATGCCGGATGTTGCGATGACTCTAGCCGTGGTTGCTCTCTATGC  
TGATGGACCTACTGCCATAAGAGACGTGGCCAGTTGGAGAGTGAAGGAGACTGAGCGAATGATTGCGATC  
TGCACAGAACCTTCGGAAGCTGGGAGCAACAGTTGAAGAAGGACCAGATTACTGCATAATCACGCCGCCCG  
AGAAGCTAAACATAGCCGAAATCGACACGTACGATGACCACAGAATGGCGATGGCCTTCTCGCTCGCTGC  
TTGTGCCGATGTTCCGGTCACCATAAGGGACCCTGGCTGCTACTAAGAAGACATTTCCAGATTACTTTGAA  
GTCCTGGAAAGGTACACCAAGCATTGA

Flax EPSPS gene 2

Locus name Lus10000788

ATGGCGCAAGTTACCAAATCTGCGGCGGAGCTAATGCAGTTGCTCTCCCCGCTACATTTGGAACCTCGAA  
GAACCAAATCCATATCCTCCTCGGTCTCATTTAGATCTTCAACATCTCCTCCGAGTTTGAAGCAACGTCG  
ACTATTGGGCAATGTAGCCGCCGCCGCCGCCGCTCCTCTTCGTGTTTTCGGCATCGCTCACCCACGGCA  
GCTGAGAAGGCTTCCACGGTGCCGGAGGAGATCGTGCTGCAGCCTATTAAGACATATCGGGGATTGTGA  
CTCTGCCTGGTTCTAAATCTCTCTCGAATCGGATTCTCCTTCTCGCCGCACTCTCTGAGGGTAAAACGT  
GGTGGACAATTTGTTGAACAGTGATGATGTTCACTACATGCTTGGAGCATTGAAAACACTCGGACTAAAT  
GTGGAGCATAGCAGTGAGCAGAAGCGGCCATTGTTGAAGGTCGTGGTGGTGTGTTTTCCGGTCGGTAAAC  
TGGGGAAGAACGATATCGAACTTTTCTTGGAAATGCTGGAACAGCTATGCGTCCGCTGACAGCTGCTGT  
AACAGCCGCTGGAGGCAACTCAAGCTACATACTCGACGGGGTACCACGAATGAGAGAGAGACCGATTGGA  
GATTTAGTTGTTGGTCTGAAGCAGCTTGGTGCTGATGTCTCTTGTCTTCTACTAGCTGCCCTCCTGTCC  
ACGTAAATGCAAAGGGAGGCCTACCAGGCGGAAAGGTTAAGCTTTCTGGATCAATTAGTAGTCAATACTT  
GACTGCTTTGCTGATGGCTGCTCCTTTGGCCCTCGGAGATGTGGAAATCGAGATTGTTGATAAACTGATT  
TCCGTTCTTATGTGGACATGACATTGAAGTTAATGGAAAGGTTTGGAGTCGCTGTGCAACACAGTGGTA  
GTTGGGATCGTTTTCTTTGTCAAAGGAGGACAAAAGTACAAGTCCCCGGGAATGCTTATGTGGAAGGCGA  
TGCTTCGAGTGCTAGTTACTTTCCTGGCCGGTGCAGCCATCACTGGTGGGACTATCACTGTTGAAGTTGT  
GGACAGAGACCAGTGTTACTGTTACGGGACCTCCGAGAGATGCCTCTGGCAAAAAGCATTGCGAGCTGT  
TGATGTTAACATGAACAAAATGCCAGACGTTGCGATGACTCTGGCTGTGGTTGCTCTCTATGCTGATGGG  
CCTACTGCCATAAGAGACGTGGCCAGTTGGAGAGTGAAGGAGACGGAGCGAATGATTGCAGTCTGCACCG  
AACTTCGGAAGCTGGGAGCAACAGTCAAGAGGGACCGGATTACTGCATTATCACGCCGCCCGAGAAGCT  
AAGCATTGCCGAAATCGACACGTACGATGACCACAGAATGGCAATGGCCTTCTCGCTCGCTGCTTGTGCC  
GATGTTCCAGTCACCATAAGGGACCCCGGGTGCCTAAGAAGACATTTCCAGATTACTTTGAAGTCTTG  
AAAGGTACACCAAGCATTGA
